# Supplementary material for: How insulin-like growth factor I binds to a hybrid insulin receptor type 1 insulin-like growth factor receptor
Source: PubMed Central journal article supplement (PMC9364964; doi:10.1016/j.str.2022.05.007), 2022-08-04
Supplement: mmc1.pdf [file mmc1.pdf]

**Structure, Volume 30**

**Supplemental Information**

**How insulin-like growth factor I binds  
to a hybrid insulin receptor type 1  
insulin-like growth factor receptor**

**Yibin Xu, Mai B. Margetts, Hari Venugopal, John G. Menting, Nicholas S. Kirk, Tristan I. Croll, Carlie Delaine, Briony E. Forbes, and Michael C. Lawrence**

|          |                                                                                         |     |
|----------|-----------------------------------------------------------------------------------------|-----|
| <b>A</b> | <b>Protein Sequence of IR-Bzip</b>                                                      |     |
| 1        | HLYPGEVCPGMDIRNNLTRLHELENCVIEGHLQILLMFKTRPEDFRDLSFPKLIMITDYLLFRVYGLLESKDLFPNLT          | 80  |
| 81       | VIRGSRLFNYALVIFEMVHLKELGLYNLMNITRGSVRIEKNNELCYLATIDWSRILDSVEDNYIVLNKDDNEECGDICP         | 160 |
| 161      | GTAKGKTNCPATVINGQFVERCWTHSHCQKVCPTICKSHGCTAEGLCCHSECLGNCSQPDDPTKCVACRNFYLDGRCVET        | 240 |
| 241      | CPPPYHFQDWRCVNFSCQDLHHKCKNSRRQGCHQYVIHNNKCIPECPSGYTMSSNLLCTPCLGCPKVCHLLEGEKT            | 320 |
| 321      | IDSVTSAQELRGCTVINGSLIINIRGGNNLAAELEANLGLIEEISGYLKIRRSYALVLSFFRKLRLIRGETLEIGNYSF         | 400 |
| 401      | YALDNQNLRLQLDWWSKHNLTITQGLFFHYNPKLCLSEIHKMEEVSGTKGRQERNDIALKTNQDQASCENELLKFSYIRT        | 480 |
| 481      | SFDKILLRWEPYWPPDFRDLGFMFLFYKEAPYQNVTEFDGQDACGSNSWTVDIDPPLRSNDPKSQNHGWLMRGLKPWT          | 560 |
| 561      | QYALFVKTLVTFSDERRTYGAKSDIIVYQTDATNPSVPLDPIVSVNSSSQIILKWKPPSDPNGNITHYLVFWERQAEDSE        | 640 |
| 641      | LFELDYCLKGLKLPRTWSPPESEDSQKHNSQSEYEDSAGECCSCPKTDSQILKELEESSFRKTFEDYLHNVVFPVPRKTS        | 720 |
| 721      | SGTGAEDPRPSRKRSLGDVGNVTVAAPTVAAPNTSSTVPTSPPEHRPFPEKVVNKESLVISGLRHFTGYRIELQACNQ          | 800 |
| 801      | DTPEERCSVAAYVSARTMPEAKADDIVGPVTHEIFENNVVHLMWQEPKEPNGLIVLYEVSYRRYGDEELHLCVSRKHFAL        | 880 |
| 881      | ERGCLRGLSPGNYSVRIRATSLAGNGSWTEPTYFYVTDYLDVPSNIA <b>RMKQLEDKVEELLSKNYHLENEVARLKKLVGE</b> | 960 |
| 961      | <b>R</b>                                                                                |     |
| <b>B</b> | <b>Protein Sequence of IGF-1Rzip</b>                                                    |     |
| 1        | EICGPGIDIRNDYQQLKRLNCTVIEGYLHILLISKAEDYRSYRFPKLTVITEYLLFRVAGLESGLDFPNLTVIRGWK           | 80  |
| 81       | LFYNYALVIFEMTNLKDIGLYNLRNITRGAIRIEKNADLCYLSTVDWSLILDAVSNNYIVGNKPPKECGDLCPGTMECKP        | 160 |
| 161      | MCEKTTINNEYNYRCWTTNRCQKMCPSCTCGKRACTENNECCHPECLGSCSAPDNDTACVACRHHYVAGVCPACPPNTYR        | 240 |
| 241      | FEGRWCVRDFCANILSAESSDSEGFVIHDGECMQECPSGFIRNGSQSMYCIPEGPCPKVCEEKTKTIDSVTSQML             | 320 |
| 321      | QGCTIFKGNLLINIRRGNNIASELENFMGLIEVVTGYVKIRHSHALVLSFLKNLRLILGEEQLEGNYSFYVLDNQLNQ          | 400 |
| 401      | LWDWDHRNLTIKAGKMYFAFNPKLVCSEIYRMEEVGTGKGRQSKGDINTRNNGERASCESDVLHFTSTTTSKNRIITWH         | 480 |
| 481      | RYRPPDYRDLISFTVYYKEAPFKNVTEYDGDQDACGSNSWNMVDVLDLPPNKDVEPGILLHGLKPWTQYAVYVKAVTLTME       | 560 |
| 561      | NHIRGAKSEILYIRTNASVPSIPLDVLASANSSSQLIVKWNPPSLPNGNLSYYIVRWQRQPQDGYLYRHNYCSKDKIPI         | 640 |
| 641      | RKYADGTIDIEEV TENPKTEVCGGEGKPCACPKTEAEKQAEKEEAAYRKFVFNFLHNSIFVPRPERKRRDVMQVANTM         | 720 |
| 721      | SSRSRNTAADTYNITDPEELETEYPFFESRVDNKERTVISNLRPFTLYRIDIHSCNHEAEKLGCSASNFVFARTMPAEG         | 800 |
| 801      | ADDIPGPVTWEPRPENSIFLKWPEPENPNGLILMYEIKYGSQVEDQRECVSRQYRKYGGAKLNRLNPNGYTARIQATSL         | 880 |
| 881      | SGNGSWTDPVFFVYQAKTYENFIH <b>RMKQLEDKVEELLSKNYHLENEVARLKKLVGERSSSEQKLISEEDLN</b>         | 952 |

**Figure S1. Protein sequences of the two constructs use to form HybZip, Related to STAR Methods.**

(A) IR-Bzip, comprising residues 1-928 of the human IR-B isoform followed by the 33-residue GCN4 zipper sequence (*orange*).

(B) IGF-1Rzip, comprising residues 1-905 of human IGF-1R followed by the 33-residue GCN4 zipper sequence (*orange*) followed by a three-serine spacer and the c-myc tag sequence EQKLISEEDLN (*blue*).

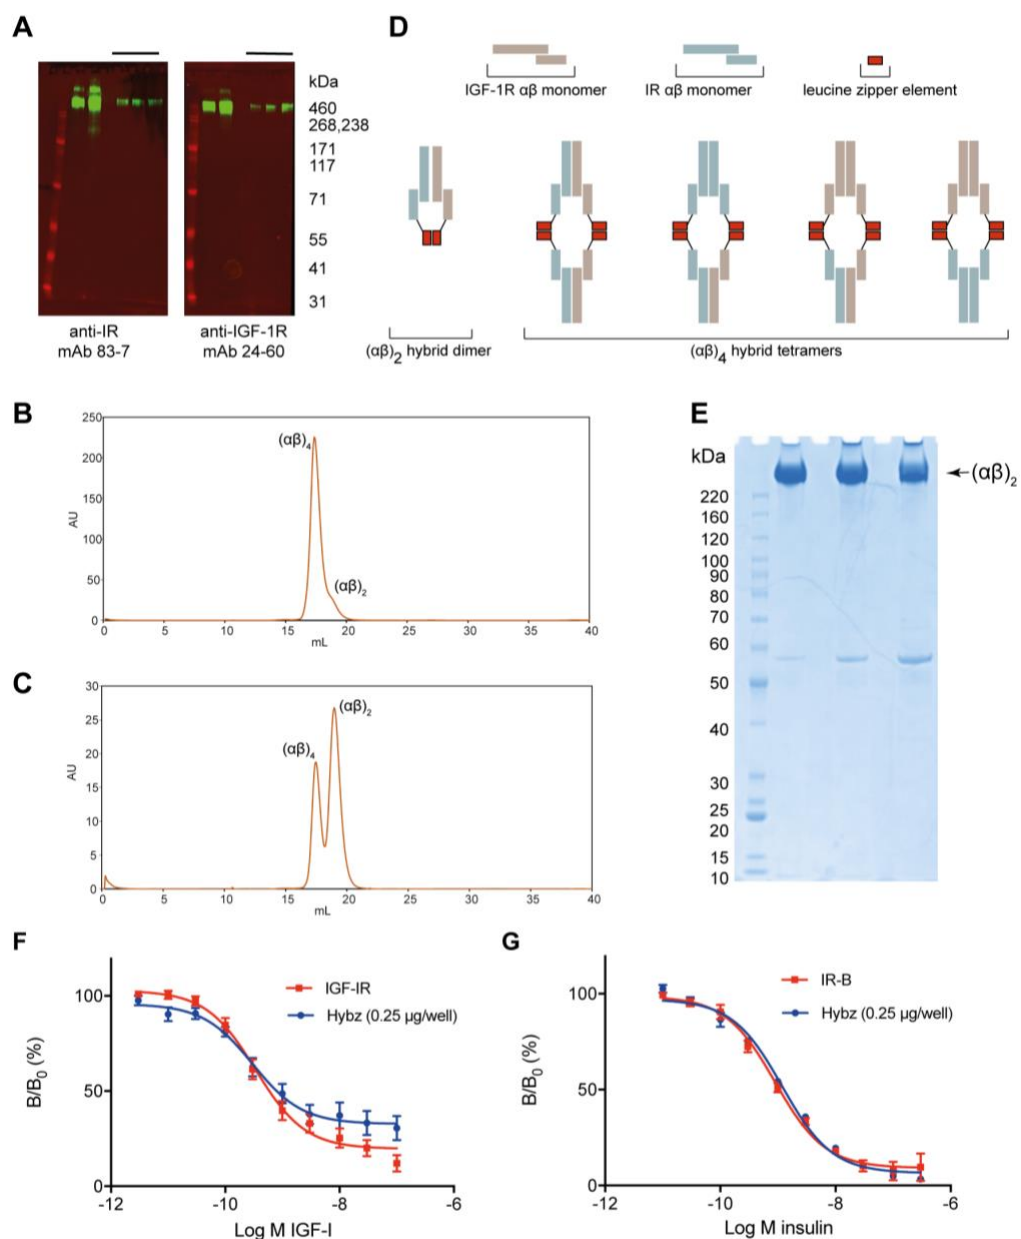

**Figure S2. Purification and characterization of HybZip, Related to STAR Methods.**

(A) Western blots of protein product obtained after serial elution from both 9E10 mAb and 18-44 mAb beads, showing presence of both species in the material (lanes with *bar* on right-hand side of each blot). Left-hand lanes in each blot correspond to pH 3 eluted material obtained from final column wash. Superfluous boundary has been removed from both blot images.

(B) Size-exclusion chromatogram obtained from protein product post affinity purification. The dominant peak corresponds to  $(\alpha\beta)_4$  species, with a shoulder corresponding to  $(\alpha\beta)_2$  species.

(C) Enrichment of  $(\alpha\beta)_2$  species following re-run of pooled shoulder fractions from (B).

(D) Schematic illustrating leucine-zipper cross-linking of receptor ectodomain dimers to form hybrid tetrameric species. All four tetrameric species will be affinity co-purified with the desired hybrid dimer, but can be separated from it by size-exclusion chromatography (see panels B and C).

(E) Non-reducing SDS-PAGE gel of pooled  $(\alpha\beta)_2$  fractions depicted in (C). Superfluous boundary and blank lanes (to the right) have been removed from the gel image.

(F) Competitive displacement assay of labelled IGF-I bound to holo-IGF-1R ( $n = 9$ ) and to HybZip ( $n = 12$ ) by unlabelled IGF-I. Error bars reflect standard error of the mean and are omitted when smaller than marker size.  $B/B_0$  = percentage of binding in the absence of competing ligand.

(G) Competitive displacement assay of labelled insulin bound to holo-IR-B ( $n = 9$ ) and to HybZip ( $n = 9$ ) by unlabelled insulin. Error bars reflect standard error of the mean and are omitted when smaller than marker size.  $B/B_0$  = percentage of binding in the absence of competing ligand.

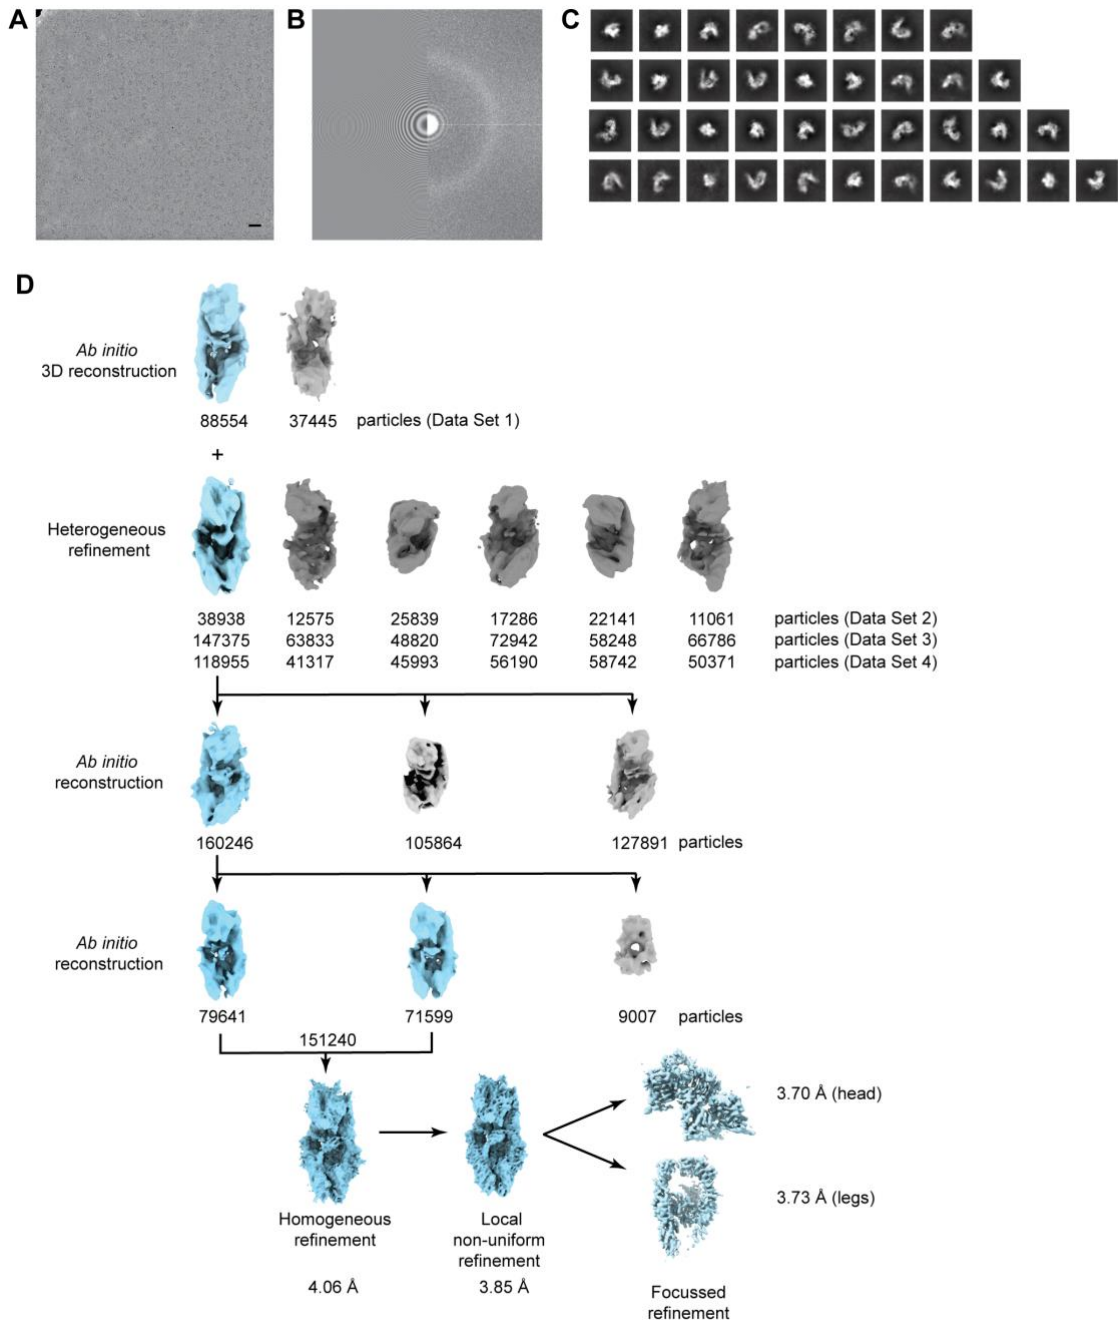

**Figure S3. CryoEM reconstruction of IGF-I-complexed HybZip, Related to STAR Methods.**

(A) Representative image obtained after motion correction (scale bar = 200 Å)

(B) Contrast transfer function associated with (A).

(C) 2D classes of particles selected from the four data sets (one data set per row; individual class images have been cropped to facilitate enlarged display).

(D) Flowchart showing the process of 3D reconstruction of IGF-I-complexed HybZip.

Full details are provided in the **STAR Methods Detail** section.

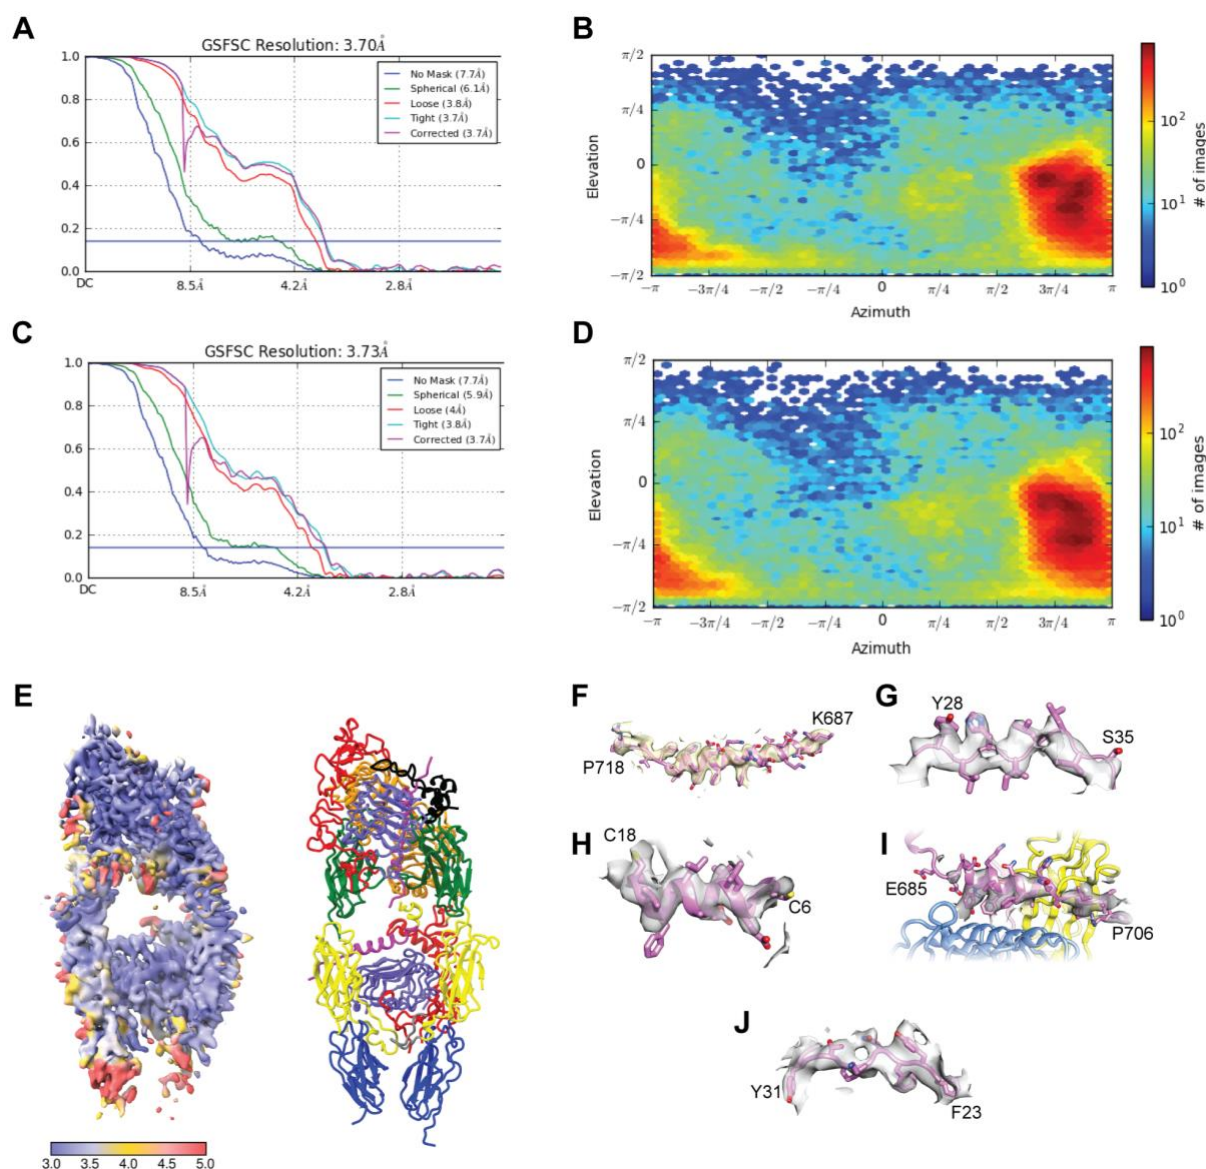

**Figure S4. Quality of the 3D reconstructions of the two receptor volumes, Related to STAR Methods.**

(A),(C) Gold-standard Fourier shell correlation (GSFSC) plots for the half-maps associated with the reconstruction of the "head" and "leg" region, respectively, of the IGF-I-complexed HybZip.

(B), (D) Angular distribution of particles contributing to the reconstruction of the "head" and "leg" region, respectively, of the IGF-I-complexed HybZip.

(E) Left panel: overlay of the "head" and "leg" regions maps, colored according to the local resolution. Right panel: ribbon diagram of IGF-I-complexed HybZip, oriented and scaled to match the local-resolution map in the left panel.

(F) CryoEM potential density for IR  $\alpha$ CT segment, residues Lys687-Pro718. Contour level 0.201, display restricted to within 3.0 Å of depicted residues.

(G) CryoEM potential density for IGF-1R domain L1, residues Tyr28-Ser35. Contour level 0.230, display restricted to within 3.0 Å of depicted residues.

(H) CryoEM potential density for B domain helix of IGF-I, residues Cys6-Cys18. Contour level 0.242, display restricted to within 3.0 Å of depicted residues.

(I) CryoEM potential density for IGF-1R  $\alpha$ CT segment, residues Glu685-Pro706. Contour level 0.201, display restricted to within 3.4 Å of depicted residues.

(J) CryoEM potential density for C domain of IGF-I, residues Phe23-Tyr31. Contour level 0.160, display restricted to within 3.0 Å of depicted residues.

**Table S1. CryoEM data collection parameters, related to STAR METHODS**

| <b>Data Set:</b>                                                  | <b>1</b> | <b>2</b> | <b>3</b> | <b>4</b> |
|-------------------------------------------------------------------|----------|----------|----------|----------|
| Pixel size (Å)                                                    | 1.06     | 1.06     | 1.06     | 1.06     |
| Dose rate (e <sup>-</sup> .pix <sup>-1</sup> .sec <sup>-1</sup> ) | 8        | 6        | 6        | 6        |
| Total dose (e <sup>-</sup> .Å <sup>-2</sup> )                     | 50       | 52       | 52       | 52       |
| No. frames/movie                                                  | 36       | 50       | 50       | 50       |
| C <sub>s</sub>                                                    | 2.7      | 2.7      | 2.7      | 2.7      |
| kV                                                                | 300      | 300      | 300      | 300      |
